# Supplementary material
Source: PubMed Central journal article supplement (PMC3576440)

**Appendix 1 (as supplied by the authors): Search strategy and publication selection for the case study. NI = noninferiority.**

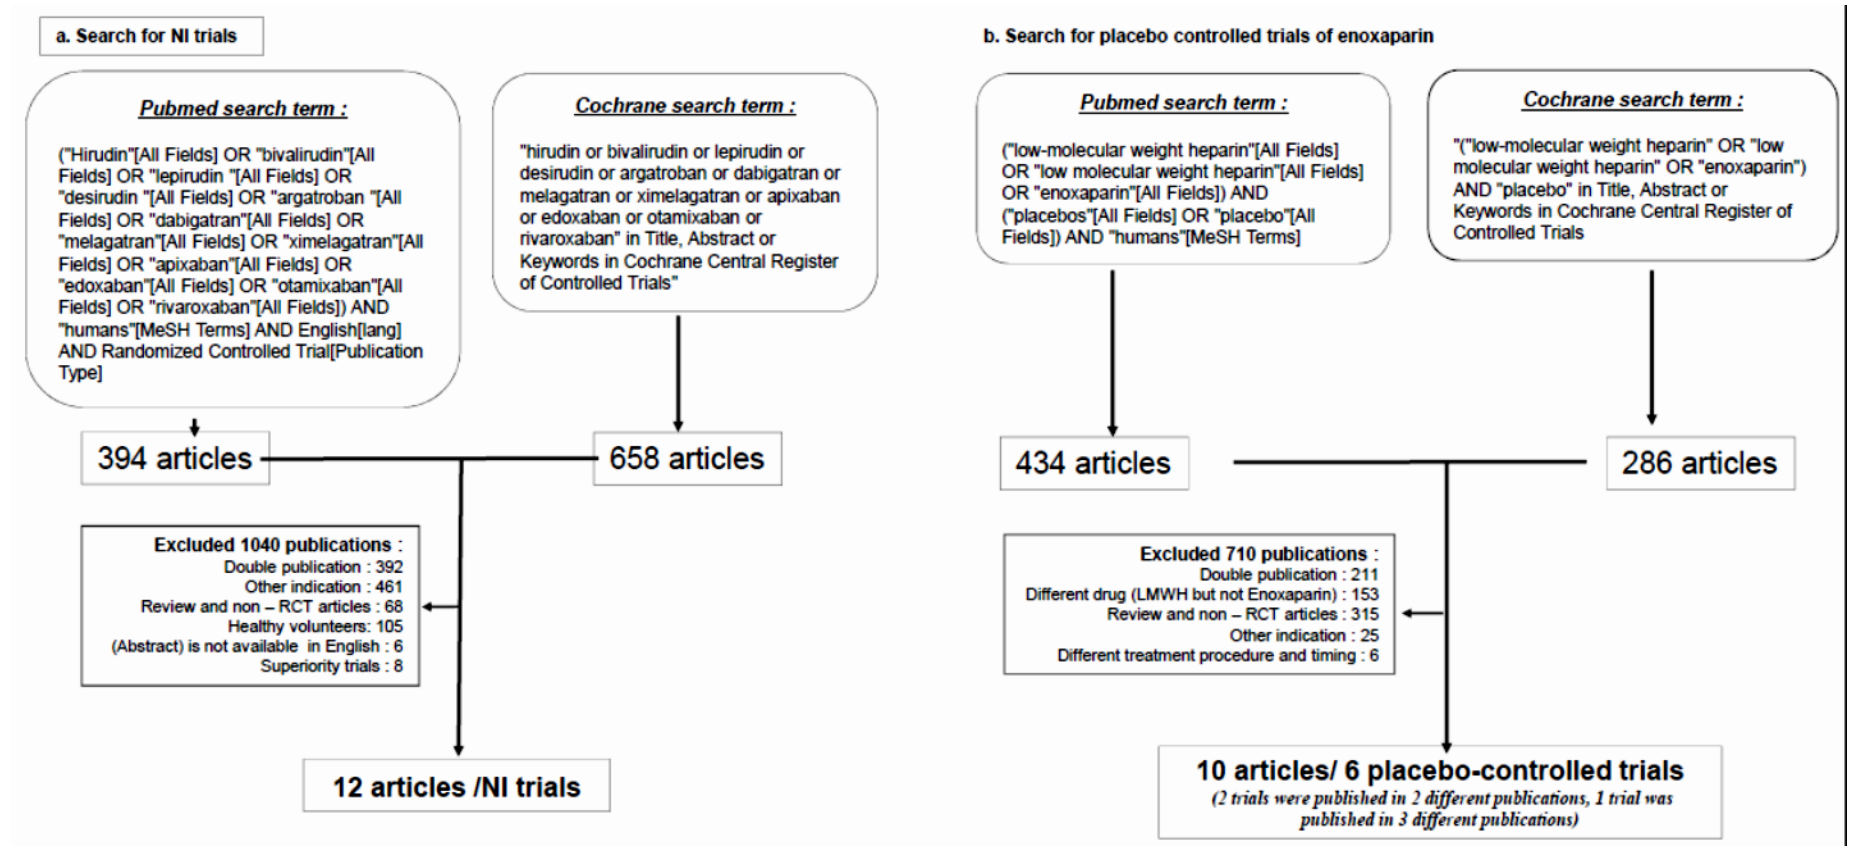

Supplement: supp_120142_coag-wangge-1-at.pdf [file supp_120142_coag-wangge-1-at.pdf]
