# Supplementary material
Source: PubMed Central journal article supplement (PMC3576440)
Supplement: supp_120142_coag-wangge-2-at.pdf [file supp_120142_coag-wangge-2-at.pdf]

**Appendix 2 (as supplied by the authors): Characteristics of the NI trials of oral anticoagulants**

| Trial/Author       | Name of drug | Duration of therapy and fol.up (days) | Dosage of enoxaparin | Primary endpoint                                                                                                   | NI margin | Method to determine NI margin                                                                                            | Start of recruitment | Mean age of subjects | Female subjects (%) | Number of subjects |
|--------------------|--------------|---------------------------------------|----------------------|--------------------------------------------------------------------------------------------------------------------|-----------|--------------------------------------------------------------------------------------------------------------------------|----------------------|----------------------|---------------------|--------------------|
| Colwell, et.al.(1) | Ximelagatran | 7-12                                  | 30 mg bid            | Total VTE (symptomatic or venographic DVT or PE)                                                                   | RD = 5%   | - Independent clinical expert committee<br>- Same NI margin as published NI trial on Tinzarapin vs Enoxaparin            | Mar 2000             | 65                   | 52                  | 1838               |
| EXPRESS. (2)       | Dabigatran   | 8-12                                  | 40 mg qd             | Major VTE (proximal DVT measured with venography, pulmonary embolism and/or death where PE could not be ruled out) | RD = 2%   | Not described                                                                                                            | Apr 2001             | 67                   | 50                  | 2835               |
| REMODEL (3)        | Dabigatran   | 6-10                                  | 40 mg qd             | Composite of total VTE (symptomatic or venographic DVT or symptomatic PE) and all-cause mortality                  | RD = 9.2% | - 67% preserved-effect of difference between enoxaparin and placebo<br>- Based on one published placebo controlled trial | Nov 2004             | 68                   | 65                  | 2183               |
| RE MOBILIZE (4)    | Dabigatran   | 12-15                                 | 30 mg bid            | Composite of total VTE (symptomatic or venographic DVT or                                                          | RD = 9.2% | - 67% preserved-effect of                                                                                                | Nov 2004             | 66                   | 58                  | 2615               |

Appendix to: Wangge G, Roes KCB, de Boer A, et al. The challenges of determining noninferiority margins: a case study of noninferiority randomized controlled trials of novel oral anticoagulants. *CMAJ* 2012; DOI:10.1503/cmaj.120142.

Copyright © 2012 Canadian Medical Association or its licensors

|               |              |       |          |                                                                                                                                                                                                                                                                                                 |           |                                                                                                                                  |          |    |    |      |
|---------------|--------------|-------|----------|-------------------------------------------------------------------------------------------------------------------------------------------------------------------------------------------------------------------------------------------------------------------------------------------------|-----------|----------------------------------------------------------------------------------------------------------------------------------|----------|----|----|------|
|               |              |       |          | symptomatic PE) and all-cause mortality                                                                                                                                                                                                                                                         |           | difference between enoxaparin and placebo<br>- Based on one published placebo controlled trial                                   |          |    |    |      |
| Re-Novate (5) | Dabigatran   | 28-35 | 40 mg qd | Composite of total VTE (symptomatic or venographic DVT or symptomatic PE) and all-cause mortality                                                                                                                                                                                               | RD = 7.7% | - 67% preserved-effect of difference between enoxaparin and placebo<br>- Based on pooled analysis of 3 placebo controlled trials | Dec 2004 | 64 | 56 | 3613 |
| EXTEND (6)    | Ximelagatran | 32-38 | 40 mg qd | Major VTE (proximal DVT as diagnosed at end-of-treatment, any clinically suspected and objectively confirmed DVT, measured by bilateral compression ultrasound clinically suspected and objectively confirmed PE and VTE-related death or death where VTE-related causes could not be excluded) | RD = 2%   | Not described                                                                                                                    | Sep 2005 | 65 | 54 | 1158 |
| RECORD 1(7)   | Rivaroxaban  | 35    | 40 mg qd | Composite of DVT measured with venography, nonfatal PE                                                                                                                                                                                                                                          | RD = 3.5% | Not described                                                                                                                    | Feb 2006 | 63 | 56 | 4541 |

|                |             |         |           |                                                                                |                        |               |          |    |    |      |
|----------------|-------------|---------|-----------|--------------------------------------------------------------------------------|------------------------|---------------|----------|----|----|------|
|                |             |         |           | and all-cause mortality                                                        |                        |               |          |    |    |      |
| RECORD 3(8)    | Rivaroxaban | 10 - 14 | 40 mg qd  | Composite of DVT measured with venography, nonfatal PE and all-cause mortality | RD = 4%                | Not described | Feb 2006 | 68 | 68 | 2531 |
| RECORD 4 (9)   | Rivaroxaban | 11-15   | 30 mg bid | Composite of DVT measured with venography, nonfatal PE and all-cause mortality | RD = 4%                | Not described | Jun 2006 | 65 | 65 | 3148 |
| ADVANCE 1 (10) | Apixaban    | 10 - 14 | 30 mg bid | Composite of DVT measured with venography, nonfatal PE and all-cause mortality | RD = 5.6%<br>RR = 1.25 | Not described | Nov-2006 | 66 | 61 | 3195 |
| ADVANCE 3(11)  | Apixaban    | 32-38   | 40 mg qd  | Composite of DVT measured with venography, nonfatal PE and all-cause mortality | RR = 1.25              | Not described | Mar 2007 | 61 | 53 | 5407 |
| ADVANCE 2 (12) | Apixaban    | 10 - 14 | 40 mg qd  | Composite of DVT measured with venography, nonfatal PE and all-cause mortality | RD = 5.6%<br>RR = 1.25 | Not described | Jun 2007 | 67 | 72 | 3057 |

## References

1. Colwell CW, Berkowitz SD, Davidson BL, et al. Comparison of ximelagatran, an oral direct thrombin inhibitor, with enoxaparin for the prevention of venous thromboembolism following total hip replacement. A randomized, double-blind study. *J Thromb Haemostasis* 2003;1:2119-30.
2. Eriksson BI, Agnelli G, Cohen AT, et al. The direct thrombin inhibitor melagatran followed by oral ximelagatran compared with enoxaparin for the prevention of venous thromboembolism after total hip or knee replacement: The EXPRESS study. *J Thromb Haemostasis* 2003;1:2490-6.
3. Eriksson BI, Dahl OE, Rosencher N, et al. Oral dabigatran etexilate vs. subcutaneous enoxaparin for the prevention of venous thromboembolism after total knee replacement: The RE-MODEL randomized trial. *J Thrombosis Haemostasis* 2007;5:2178-85.

Appendix to: Wangge G, Roes KCB, de Boer A, et al. The challenges of determining noninferiority margins: a case study of noninferiority randomized controlled trials of novel oral anticoagulants. *CMAJ* 2012; DOI:10.1503/cmaj.120142.

Copyright © 2012 Canadian Medical Association or its licensors

4. Ginsberg JS, Davidson BL, Comp PC, et al. Oral thrombin inhibitor dabigatran etexilate vs north american enoxaparin regimen for prevention of venous thromboembolism after knee arthroplasty surgery. *J Arthroplasty* 2009;1;24:1-9.
5. Eriksson BI, Dahl OE, Rosencher N, et al. Dabigatran etexilate versus enoxaparin for prevention of venous thromboembolism after total hip replacement: A randomised, double-blind, non-inferiority trial. *The Lancet* 2007;370:949-56.
6. Agnelli G, Eriksson BI, Cohen AT, et al. Safety assessment of new antithrombotic agents: Lessons from the EXTEND study on ximelagatran. *Thromb Res* 200;123(3):488-97.
7. Eriksson BI, Borris LC, Friedman RJ, et al. Rivaroxaban versus Enoxaparin for Thromboprophylaxis after Hip Arthroplasty. *N Engl J Med* 2008;358:2765-75.
8. Lassen MR, Ageno W, Borris LC, et al. Rivaroxaban versus enoxaparin for thromboprophylaxis after total knee arthroplasty. *N Engl J Med* 2008;358:2776-86.
9. Turpie AGG, Lassen MR, Davidson BL, et al. Rivaroxaban versus enoxaparin for thromboprophylaxis after total knee arthroplasty (RECORD4): A randomised trial. *The Lancet* 2009;373:1673-80.
10. Lassen MR, Raskob GE, Gallus A, et al. Apixaban or enoxaparin for thromboprophylaxis after knee replacement. *N Engl J Med* 2009;36:594-604.
11. Lassen MR, Gallus A, Raskob GE, et al. Apixaban versus enoxaparin for thromboprophylaxis after hip replacement. *N Engl J Med* 2010;363:2487-98.
12. Lassen MR, Raskob GE, Gallus A, et al. Apixaban versus enoxaparin for thromboprophylaxis after knee replacement (ADVANCE-2): A randomised double-blind trial. *The Lancet* 2010;375:807-15.
