# Supplementary material
Source: PubMed Central journal article supplement (PMC3576440)
Supplement: supp_120142_coag-wangge-3-at.pdf [file supp_120142_coag-wangge-3-at.pdf]

**Appendix 3 (as supplied by the authors): Placebo-controlled trials of enoxaparin**

| <b>Name of author</b> | <b>Date of publication</b> | <b>Duration of therapy (days)</b> | <b>Dosage of enoxaparin</b>   | <b>Primary endpoint</b>                          | <b>Mean age of subjects</b> | <b>Female subjects (%)</b> | <b>Number of subjects</b> |
|-----------------------|----------------------------|-----------------------------------|-------------------------------|--------------------------------------------------|-----------------------------|----------------------------|---------------------------|
| Turpie, et.al(1)      | Oct-86                     | 14                                | 30 mg bid                     | DVT measured with venography                     | 67                          | 52                         | 100                       |
| Leclerc, et.al (2)    | Jan-92                     | 14                                | 30 mg bid                     | DVT measured with venography                     | 69                          | 60                         | 131                       |
| Kalodiki, et.al (3)   | Jun-96                     | 8 - 12                            | 40 mg qd                      | Composite of DVT measured with venography and PE | 67                          | 65                         | 170                       |
| Samama, et.al (4)     | Jan-97                     | 10 ± 2                            | 40 mg qd                      | Composite of DVT measured with venography and PE | 69                          | 42                         | 93                        |
| Fuji, et.al (1)(5)    | Jun-08                     | 14                                | 20 mg qd, 20 mg bid, 40 mg qd | Composite of DVT measured with venography and PE | 62                          | 88                         | 419                       |
| Fuji, et.al (2)(5)    | Jun-08                     | 14                                | 20 mg qd, 20 mg bid, 40 mg qd | Composite of DVT measured with venography and PE | 70                          | 84                         | 364                       |

Note: qd= quaque die (once daily), bid = bis in die (twice daily), DVT = deep vein thrombosis, PE = pulmonary embolism, VTE = venous thrombo embolic events, RD = risk difference, RR = relative risk, NI = non-inferiority, 1 Source : clinicaltrial.gov

**References**

1. Turpie AGG, Levine MN, Hirsh J, et al. A randomized controlled trial of a low-molecular-weight heparin (enoxaparin) to prevent deep-vein thrombosis in patients undergoing elective hip surgery. *N Engl J Med* 1986;315:925-9.

2. Leclerc JR, Geerts WH, Desjardins L, et al. Prevention of deep vein thrombosis after major knee surgery--a randomized, double-blind trial comparing a low molecular weight heparin fragment (enoxaparin) to placebo. *Thromb Haemost* 1992;67:417-23.
3. Kalodiki EP, Hoppensteadt DA, Nicolaides AN, et al. Deep venous thrombosis prophylaxis with low molecular weight heparin and elastic compression in patients having total hip replacement. A randomised controlled trial. *Int Angiol* 1996;15:162-8.
4. Samama CM, Clergue F, Barre J, et al. Low molecular weight heparin associated with spinal anaesthesia and gradual compression stockings in total hip replacement surgery. arar study group. *Br J Anaesthes* 1997;78:660-5.
5. Fuji T, Ochi T, Niwa S, Fujita S. Prevention of postoperative venous thromboembolism in japanese patients undergoing total hip or knee arthroplasty: Two randomized, double-blind, placebo-controlled studies with three dosage regimens of enoxaparin. *J Orthopaed Sci* 2008;Sep 1:442-51.
