# Supplementary material
Source: PubMed Central journal article supplement (PMC3576440)

**Appendix 4 (as supplied by the authors): Meta-analysis of placebo controlled trials of enoxaparin for risk difference (RD) and relative risk (RR); M1s and M2s**

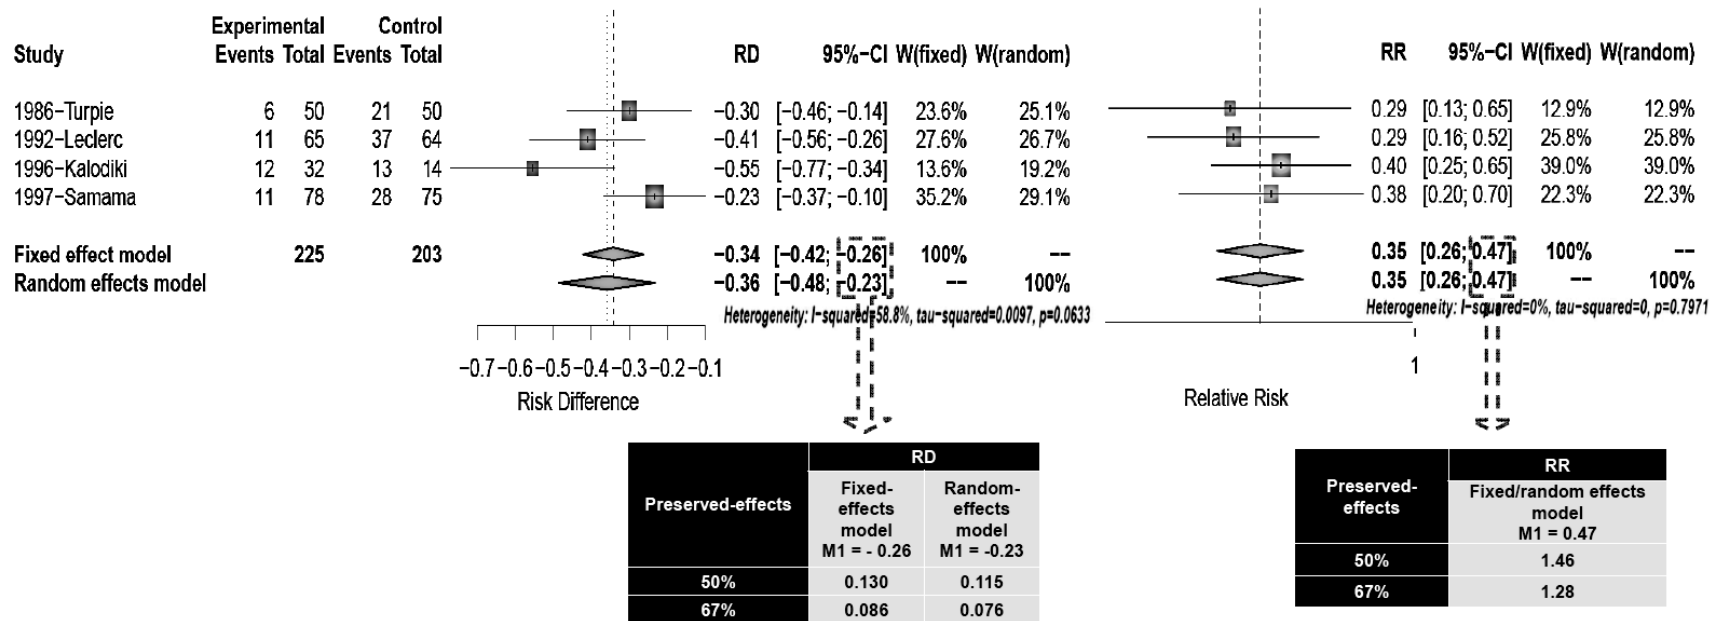

Supplement: supp_120142_coag-wangge-4-at.pdf [file supp_120142_coag-wangge-4-at.pdf]
